# Supplementary material for: eIF4G is retained on ribosomes elongating and terminating on short upstream ORFs to control reinitiation in yeast
Source: PubMed Central journal article supplement — Nucleic Acids Res. 2021 Aug 5;49(15):8743–56. doi: 10.1093/nar/gkab652 (PMC8421214; doi:10.1093/nar/gkab652), 2021-08-05
Supplement: gkab652_supplemental_file.pdf [file gkab652_supplemental_file.pdf]

# SUPPLEMENTARY MATERIAL

## SUPPLEMENTARY MATERIALS AND METHODS

**Construction of plasmids and yeast strains** Strain YMP43 carrying chromosomal deletion of *GCN4* gene together with its 5' UTR was constructed in the following steps. (i) Primers VM4 (it is a composite primer, the 5' part of which base pairs with the sequence corresponding to the extreme 5' UTR of the *GCN4* gene [far upstream of all RPEs] and the discontinuous 3' part of which base pairs with the sequence corresponding to the very beginning of the *GCN4::KanMx* cassette) and VM25 (base pairing with the very end of the *GCN4::KanMx* cassette) were used to PCR amplify a DNA fragment containing the *GCN4::KanMx* cassette using the genomic DNA isolated from the Euroscarf strain BY4741 *gcn4Δ* as the template. (ii) The purified PCR product was then used to transform H2880 to delete the *GCN4* gene and its entire 5' UTR and the resulting transformants were selected for the G418 resistance. The deletion of *GCN4* and its 5' UTR was verified by PCR. *KanMX* was then replaced with *HisG-URA-HisG* by transforming the *BglIII-EcoRI* ~4.6 kb fragment from *pAG25-kanMX::HisG-URA-HisG* (pMP85). Uracil auxotrophy was regained by growing the cells on 5- FOA plates.

The strain YMP47 carrying a triple deletion of *GCN4* (includes its 5'-UTR), *TIF4631* and *TIF4632* genes was created in the following steps: (i) The strain YMP43 was transformed with the PCR amplified *tif4632::KanMX* DNA fragment using the primers MP224, MP227 and the genomic DNA isolated from the Euroscarf strain BY4741 *tif4632Δ* as the template. The resulting transformants were selected for the G418 resistance. The deletion of *TIF4632* was verified by PCR. *KanMX* was then replaced with *HisG-URA-HisG* as described above to generate YMP44. (ii) YMP44 was then transformed with pBAS2004 (*pTIF4632 URA3 CEN4*), subsequently with the PCR amplified *tif4631::KanMX* DNA fragment using the primers MP220, MP223 and the genomic DNA isolated from the Euroscarf strain BY4741 *tif4631Δ* as the template. The resulting transformants were selected for the G418 resistance. The deletion of *TIF4631* was verified by PCR.

The strain YMP61 carrying a triple deletion of *GCN4* (includes its 5'-UTR), *TIF1*, *TIF2* genes was created in the following steps: (i) The strain YMP43 was transformed with the PCR amplified *tif2::KanMX* DNA fragment using the primers MP156, MP157 and the genomic DNA isolated from the Euroscarf strain BY4741 *tif2Δ* as the template. The resulting transformants were selected for the G418 resistance. The deletion of *TIF2* was verified by PCR. *KanMX* was then replaced with *HisG-URA-HisG* as described above to generate YMP59. (ii) YMP59 was then transformed with p533 (*yEp195-TIF2-URA3*), subsequently with the PCR amplified *tif1::KanMX* DNA fragment using the primers MP153, MP154 and the genomic DNA isolated from the Euroscarf strain BY4741 *tif1Δ* as the template. The resulting transformants were selected for the G418 resistance. The deletion of *TIF1* was verified by PCR.

The strain YMP65 carrying a double deletion of *GCN4* (includes its 5'-UTR), *TIF45* genes was constructed by transforming the strain YMP43 first with pMP95 (*yEp195-TIF45-URA3*), subsequently with the PCR amplified *tif45::KanMX* cassette using the primers MP156, MP157 and the genomic DNA isolated from the Euroscarf strain BY4741 *tif45Δ* as the template. The resulting transformants were selected for the G418 resistance. The deletion of *TIF45* was verified by PCR.

To generate the yeast strains YMP52, YMP53, YMP55, YMP56, YMP57 and YMP91 the yeast strain YVM47 was first transformed with the plasmids pMP82, pMP83, pMP89, pMP90, pMP91, pMP124, respectively, and the uracil auxotrophy was regained by growing the cells that have evicted the original YEp-*TIF4632-URA* on SD plates containing 5-fluoroorotic acid.

To generate the yeast strains YMP63, YMP67 the yeast strains YVM61, YMP65 were first transformed with the plasmids pMP93, pMP97, respectively, and the uracil auxotrophy was regained by growing the cells that have evicted the original *URA* plasmids on SD plates containing 5-fluoroorotic acid.

The plasmids described below were produced with the help of PCR using the indicated primers and DNA templates: pMP82: MP1 / MP2 and pBAS2078; for pMP83: MP150 / MP2 and pBAS2078; for pMP91: MP294 / MP295 and pMP83; for pMP95: MP314 / MP315 and the genomic DNA of BY4741 *gcn4Δ*; for pMP124: MP307 / MP295 and pMP90. The resulting PCR products were digested with *Sall* & *SacI* (for pMP82), *BamHI* & *Sall* (for pMP83), *BmgBI* & *NheI* (for pMP91) and *XmaI* & *XbaI* (for pMP95), *NheI* & *MscI* (pMP124) ligated into equally digested p349 and p350, pMP90, respectively.

The plasmids described below were produced with the help of fusion PCR using the indicated two to four pairs of primers and DNA templates: for pMP93: (i) MP2 / MP309 and p544, (ii) MP158 / MP308 and p544; for pMP97: (i) MP314 / MP318 and pMP95 (ii) MP315 / MP319 and pMP95; for pMP90 (i) MP307 / MP305 and pMP83 (ii) MP306 / MP303 and pMP83 (iii) MP304 / MP1 and pMP83; for pMP89 (i) MP296 / MP301 and pMP83, (ii) MP302 / MP299 and pMP83, (iii) MP300 / MP297 and pMP83 and (iv) MP298 / MP1 and pMP83. Thus obtained PCR products were used in a 1:1 ratio as templates for a third PCR amplification with primers MP2 / MP58 (for pMP93), MP314 / MP315 (for pMP97), MP1 / MP307 (for pMP90) and MP1 / MP296 (for pMP89). The resulting PCR products were cleaved with *AgeI* and *SphI* (for pMP93), *XmaI* & *XbaI* (for pMP97) and *SacI* & *MscI* (for pMP90), *NheI* & *SacI* (for pMP89) and ligated into equally digested p544, p349 and pMP83, respectively.

pMP85 was created by inserting the *KpnI* and *Sall* digested pMP42 into p471 digested with the same enzymes.

pMP98 was created by inserting the *SpeI* digested pMP80 into pMP96 digested with the same enzyme.

pMP122 and pMP123 were created by inserting the *Sall* & *BstEII* digested custom-made synthetic double-stranded DNA fragments (Invitrogen™ GeneArt™ Strings™ DNA fragments) into pMP29 digested with the same enzymes.

## SUPPLEMENTARY REFERENCES

1. Mohammad, M.P., Munzarova Pondelickova, V., Zeman, J., Gunisova, S. and Valasek, L.S. (2017) In vivo evidence that eIF3 stays bound to ribosomes elongating and terminating on short upstream ORFs to promote reinitiation. *Nucleic Acids Res*, **45**, 2658-2674.
2. Munzarová, V., Pánek, J., Gunišová, S., Dányi, I., Szamecz, B. and Valášek, L.S. (2011) Translation Reinitiation Relies on the Interaction between eIF3a/TIF32 and Progressively Folded cis-Acting mRNA Elements Preceding Short uORFs. *PLoS Genet*, **7**, e1002137.
3. Gunisova, S. and Valasek, L.S. (2014) Fail-safe mechanism of GCN4 translational control-uORF2 promotes reinitiation by analogous mechanism to uORF1 and thus secures its key role in GCN4 expression. *Nucleic Acids Res*, **42**, 5880-5893.
4. Gunisova, S., Hronova, V., Mohammad, M.P., Hinnebusch, A.G. and Valasek, L.S. (2018) Please do not recycle! Translation reinitiation in microbes and higher eukaryotes. *FEMS Microbiol Rev*, **42**, 165-192.
5. Hinnebusch, A.G. (2005) Translational regulation of GCN4 and the general amino acid control of yeast. *Annu Rev Microbiol.*, **59**, 407-450.
6. Nielsen, K.H., Szamecz, B., Valasek, L.J., A., Shin, B.S. and Hinnebusch, A.G. (2004) Functions of eIF3 downstream of 48S assembly impact AUG recognition and GCN4 translational control. *EMBO J.*, **23**, 1166-1177.
7. Mueller, P.P. and Hinnebusch, A.G. (1986) Multiple upstream AUG codons mediate translational control of *GCN4*. *Cell*, **45**, 201-207.
8. Gietz, R.D. and Sugino, A. (1988) New yeast-Escherichia coli shuttle vectors constructed with in vitro mutagenized yeast genes lacking six-base pair restriction sites. *Gene*, **74**, 527-534.
9. de la Cruz, J., Iost, I., Kressler, D. and Linder, P. (1997) The p20 and Ded1 proteins have antagonistic roles in eIF4E-dependent translation in *Saccharomyces cerevisiae*. *Proc Natl Acad Sci U S A*, **94**, 5201-5206.
10. Cuchalová, L., Kouba, T., Herrmannová, A., Dányi, I., Chiu, W.-I. and Valášek, L. (2010) The RNA Recognition Motif of Eukaryotic Translation Initiation Factor 3g (eIF3g) Is Required for Resumption of Scanning of Posttermination Ribosomes for Reinitiation on GCN4 and Together with eIF3i Stimulates Linear Scanning. *Mol Cell Biol*, **30**, 4671-4686.
11. Tarun, S.Z., Jr. and Sachs, A.B. (1997) Binding of eukaryotic translation initiation factor 4E (eIF4E) to eIF4G represses translation of uncapped mRNA. *Mol Cell Biol*, **17**, 6876-6886.

## SUPPLEMENTARY FIGURES

**NON-STARVATION: *GCN4* translation is REPRESSED**  
(high levels of TC)

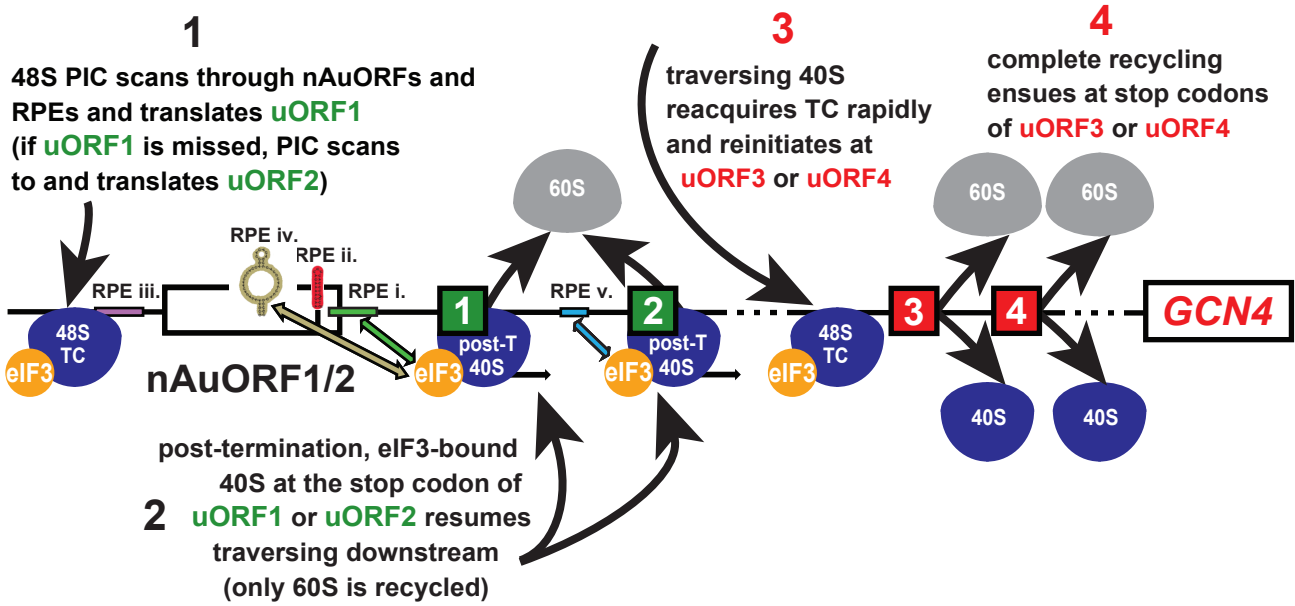

**STARVATION: *GCN4* translation is DEREPRESSED**  
(uncharged tRNAs => GCN2 => eIF2 $\alpha$ -P => low levels of TC)

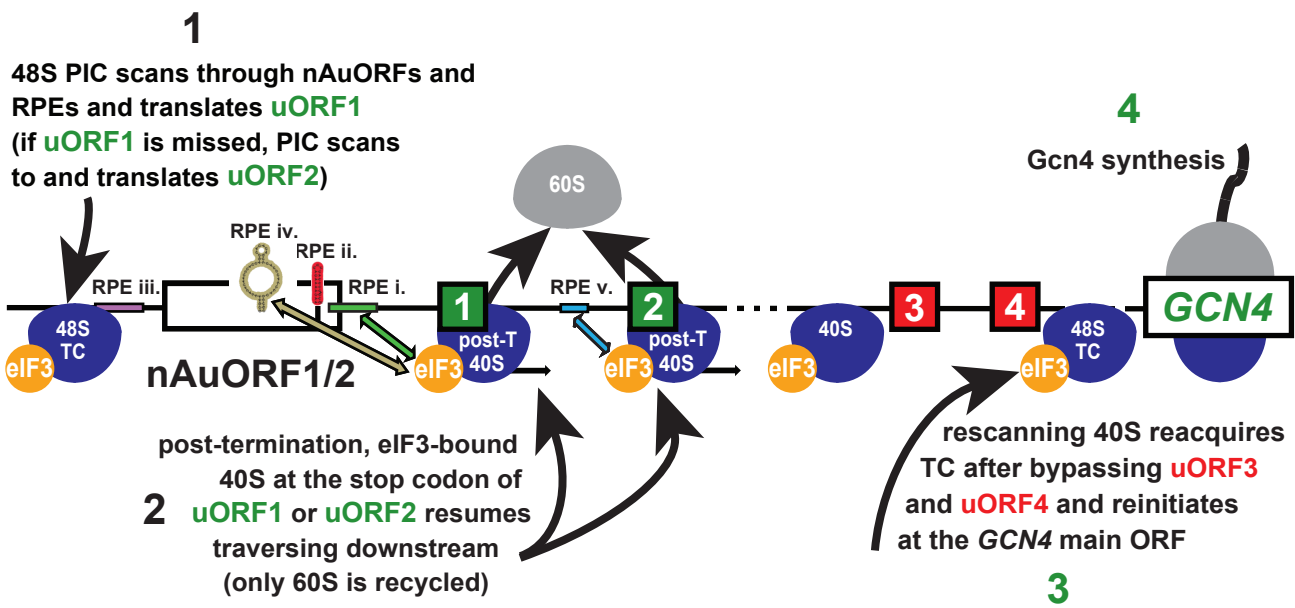

**Supplementary Figure 1. Translational regulation of *GCN4*.** The reinitiation (REI)-permissive uORF1 is translated under both, nutrient-replete and deplete conditions. After its translation, the 60S ribosomal subunit is released, whereas the 40S subunit remains bound to the *GCN4* mRNA – due to a specific interaction between REI-promoting elements (RPEs) of uORF1 and eIF3 (1,2) – to eventually resume traversing downstream. It cannot start “scanning” *per se* for the next AUG until it re-acquires an active eIF2 ternary complex (eIF2-TC), the levels of which are reduced under starvation/stress conditions. uORF2, functionally mimicking uORF1, was proposed to serve as its backup to capture 40Ses that ‘leaky-scanned’ past uORF1, thereby maximizing the REI potential as a fail-safe mechanism (3). In non-starved cells, where eIF2-TC levels are high, nearly all of the traversing 40Ses rebind the eIF2-TC before reaching the REI-non-permissive uORF3 or uORF4. Upon their translation, terminating ribosomes undergo full ribosomal recycling, thus preventing REI at the main CDS of *GCN4*. When eIF2-TC levels are low, a large proportion of the 40Ses will bypass uORFs 3 and 4 and – upon eventual acquisition of the eIF2-TC – reinitiate at the *GCN4* start codon. Hence, whereas the stress response shuts down general translation initiation, as eIF2-TCs are required for translation of most mRNAs, it at the same time stimulates *GCN4* translation to trigger stress adaptation programs (reviewed in (4,5)).

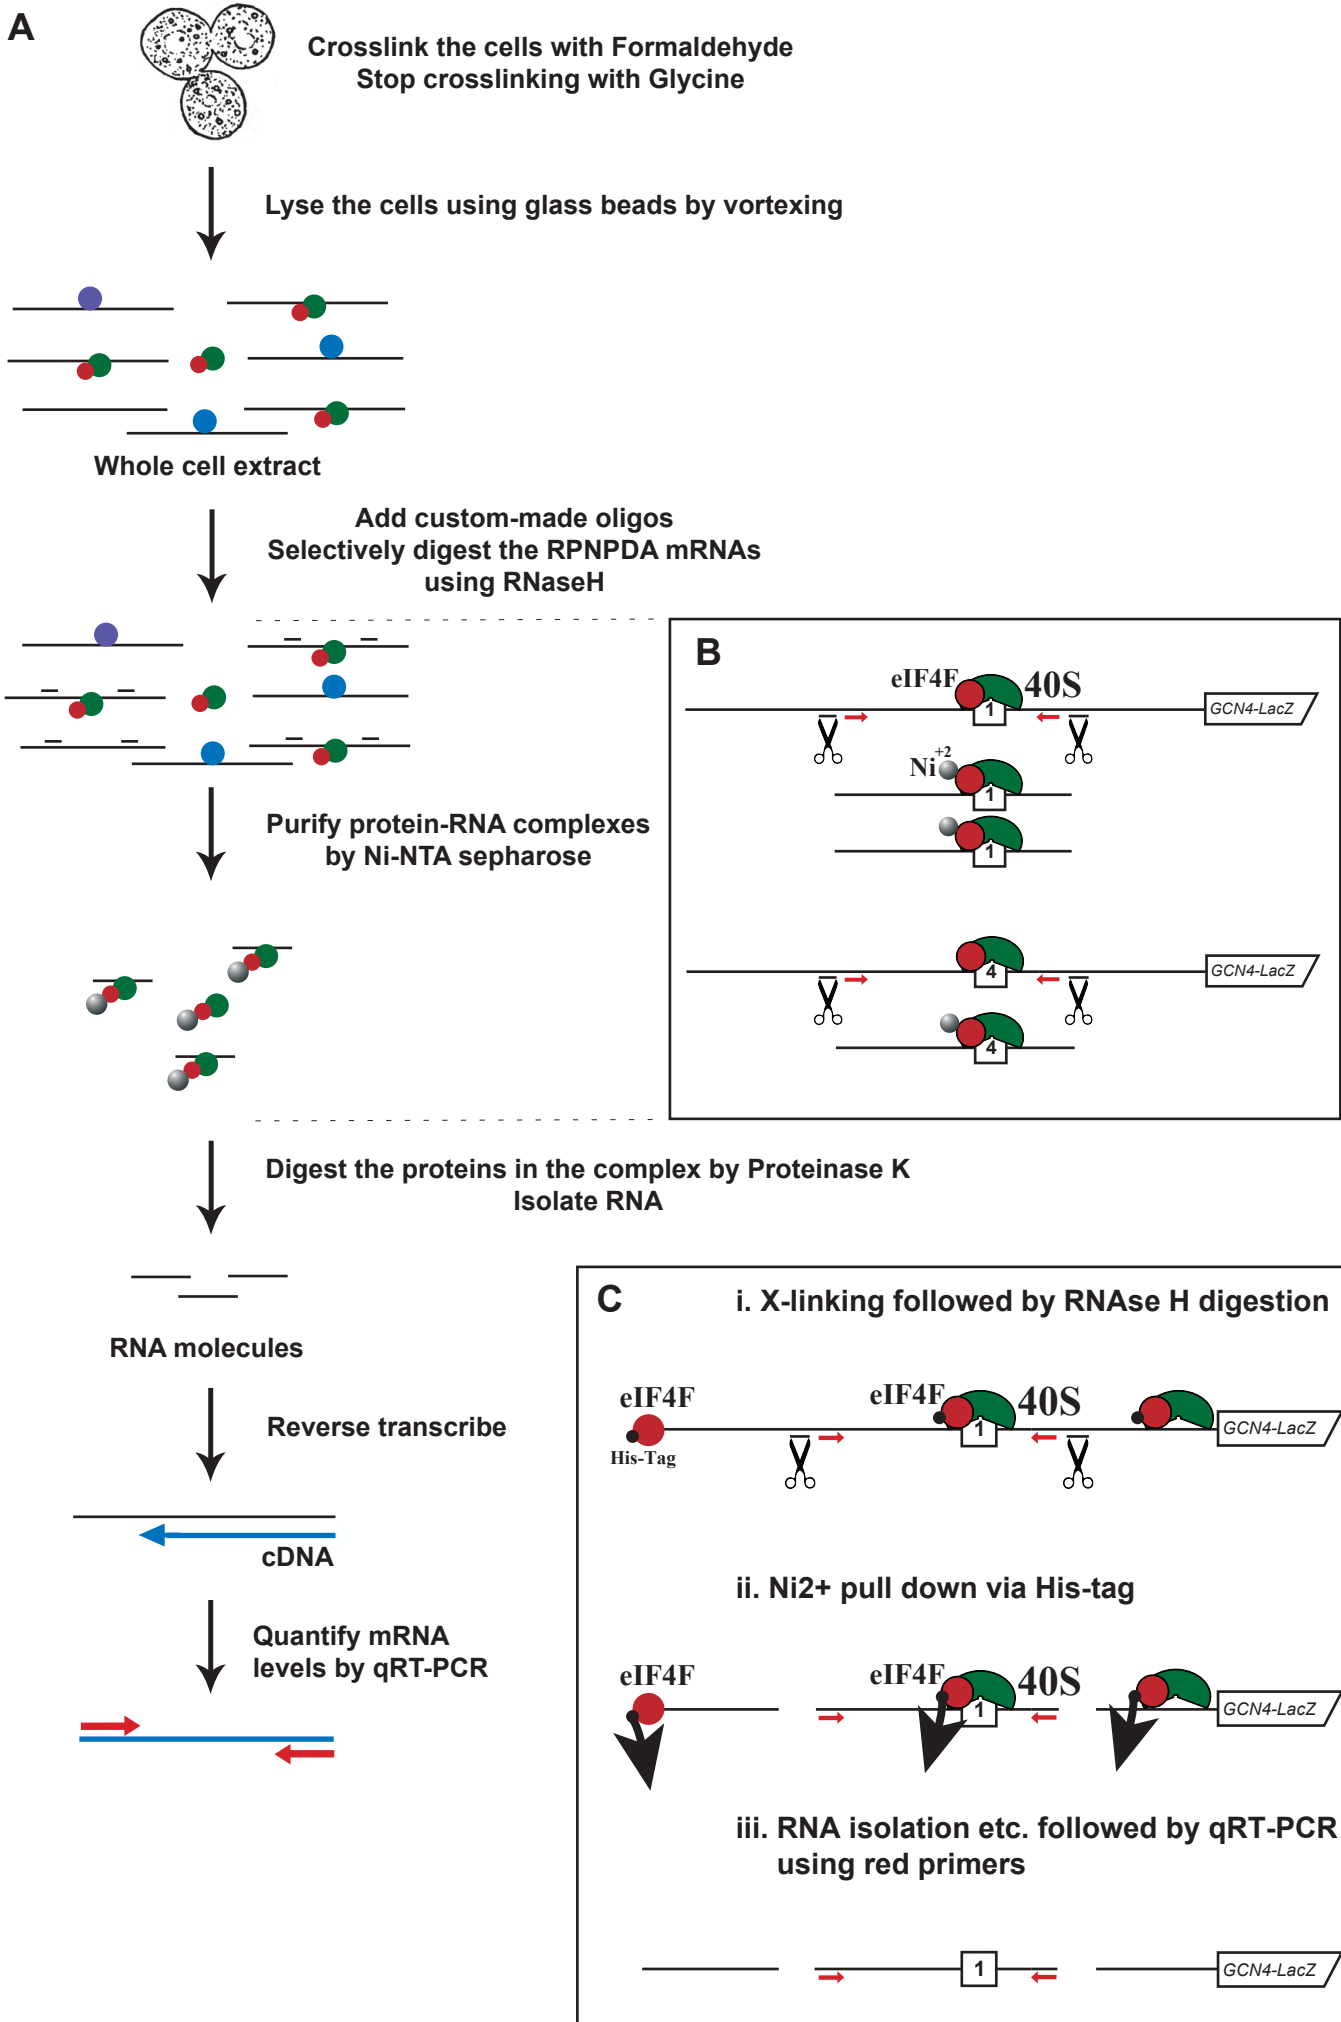

**Supplementary Figure 2. Schematic representation of yeast *in vivo* RNA-protein Ni<sup>2+</sup>-pull down (RaP-NiP) assay using formaldehyde crosslinking.** (A) The basic scheme of the RaP-NiP is described in the form of a flowchart. Green and red balls represent 40S ribosomes and eIF4F complexes, respectively, grey balls stand for the Ni<sup>2+</sup> beads, and purple and blue balls depict some non-specific RNA binding proteins. Exponentially growing yeast cells were crosslinked with 1% formaldehyde. Crosslinking was stopped by adding glycine and the fixed cells were lysed using glass beads by rigorous vortexing. Pre-cleared whole cell extract (WCE) containing RaP-NiP mRNAs in protein-RNA complexes were selectively digested with RNase H using sequence specific custom-made oligos. The resulting specific mRNA segments were purified with the help of a given His-tagged component of the yeast eIF4F complex, or its mutant variants, using the Ni-NTA sepharose beads. Thus isolated protein-RNA complexes were subsequently treated with Proteinase K, and the captured RNAs were further purified by hot phenol extraction, reverse transcribed and their amounts were then quantified by qRT-PCR. (B) The schematic boxed on the right-hand side illustrates typical amounts of RNase H digested RNA segments of REI-permissive uORF1 and REI-non-permissive uORF4 from the *GCN4* mRNA leader co-purifying with His-tagged eIF4G or eIF4A, the typical ratio of which is ~2:1. (C) The schematic boxed at the bottom illustrates in detail that only the segment of interest spanning the particular uORF region and no upstream or downstream sequences is specifically analyzed in our assay. In other words, since we first cut with RNase H to eliminate the upstream part of the reporter including the cap, as well as the downstream part following our segment of interest from our analysis, and only after that we carry out the pull down step, we retrieve and subsequently analyze with qRT-PCR only those mRNA segments that originated from ribosomes bound by our factor of interest and only at the site of our interest.



### Supplementary Figure 3

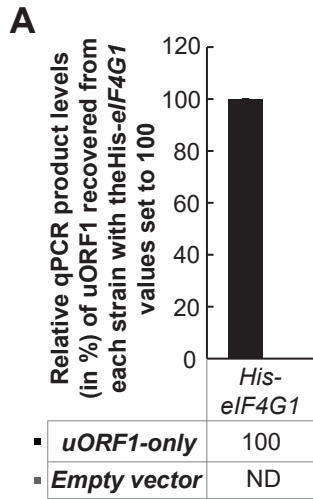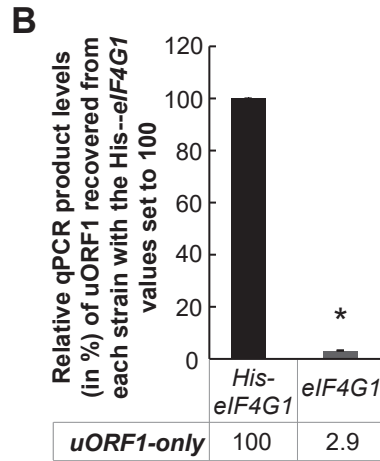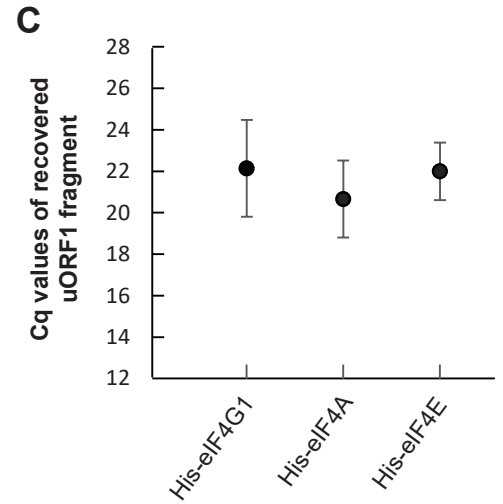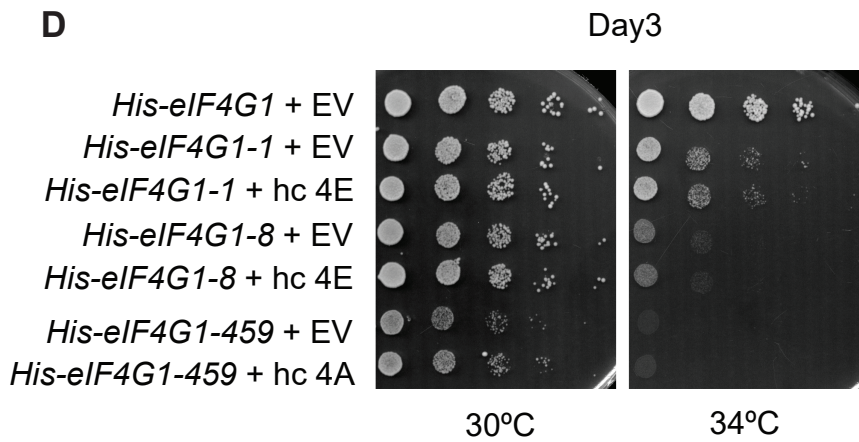

**Supplementary Figure 3. Cells expressing an empty vector or untagged eIF4G recover only background amounts of the uORF1 segment.** (A - B) The yeast strains YMP53 (*gcn4Δ*(incl. its 5' UTR), *tif4631Δ*, *tif4632Δ* His-eIF4G1), YMP52 (*gcn4Δ*(incl. its 5' UTR), *tif4631Δ*, *tif4632Δ* eIF4G1) were introduced either with an empty vector or the uORF1-only RaP-NiP construct shown in Figure 1A and treated as described in Figure 1B. Relative qPCR product levels (in %) of the Y1 segment of uORF1 recovered from each strain were processed as described in Figure 1B with the values of His-eIF4G1 uORF1-only set to 100 % (asterisks indicate that  $p < 0.05$ ); ND-not determined. (C) The yeast strains YMP53, YMP63, YMP67 were introduced with the uORF1-only construct shown in Figure 1A and treated as described in Figure 1B. The quantification cycle (Cq) values of recovered uORF1 segment from each strain are displayed with standard deviations obtained from at least 3 independent experiments from three independent transformants (i.e. biological replicates). (D) Growth defects of individual eIF4G mutants are not suppressible by high copy expression of factors whose eIF4G-binding domains are not affected. The strains described in Figure 3C were transformed individually with YEplac112-based plasmids carrying either eIF4A or eIF4E alleles, or an empty plasmid, and the resulting transformants were spotted in five serial 10-fold dilutions on SD plates and incubated at 30°C or 34°C for 3 days.

A

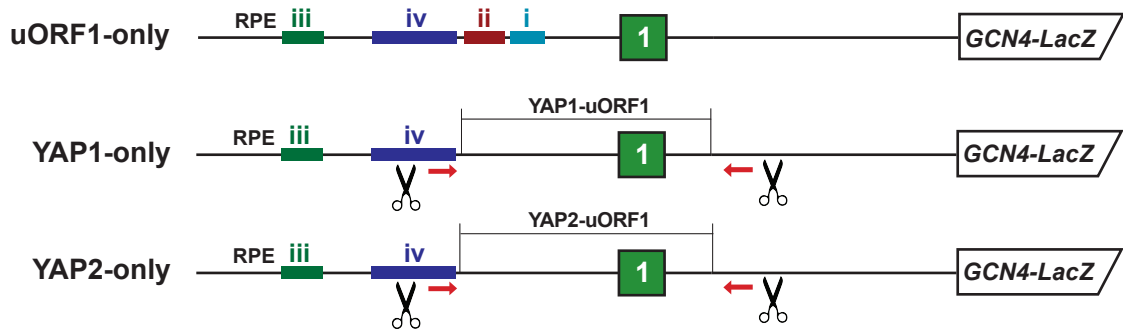

B

|            | His-eIF4G1 |      |           |      |
|------------|------------|------|-----------|------|
|            | 30°C       |      | 34°C      |      |
| uORF1-only | 542 ± 43   | 100% | 277 ± 18  | 100% |
| YAP1-only  | 1850 ± 48  | 341% | 1983 ± 71 | 365% |
| YAP2-only  | 662 ± 3.4  | 122% | 635 ± 26  | 229% |

Units of  $\beta$ -galactosidase activity

**Supplementary Figure 4. uORF1 of YAP1 and YAP2 promote reinitiation. (A)** Schematics showing the wt uORF1-only (pMP29), and YAP1- and YAP2-only RaP-NiP constructs (for details, please, see Supplementary Figure 5A and B). **(B)** The *GCN4-lacZ* constructs from panel A were introduced individually into the strain YMP53 (*gcn4Δ tif4631Δ tif4632Δ His-eIF4G1*). The resulting transformants were pre-cultured in minimal media overnight, diluted to OD<sub>600</sub> ~ 0.35, grown for an additional 6 hr and the β-galactosidase activities were measured and analyzed as described in Figure 4B (\**p*<0.05).

A

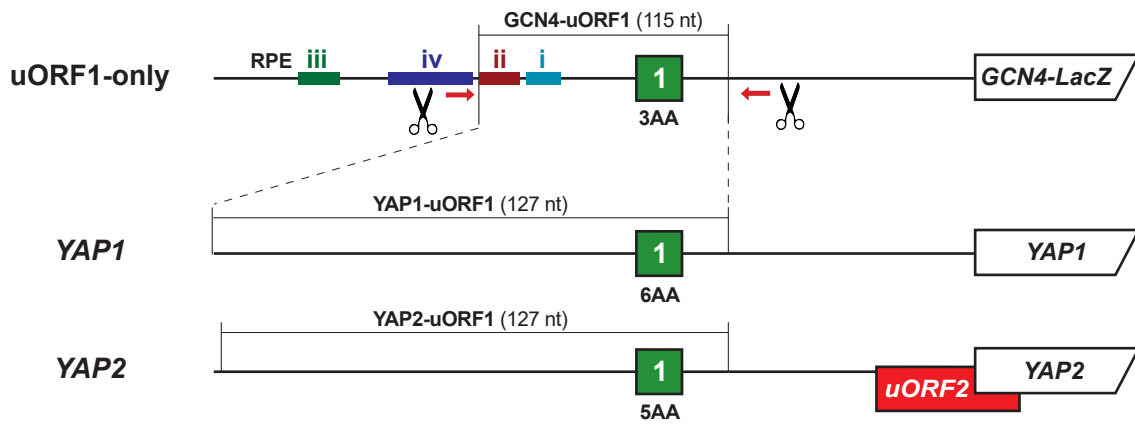

B

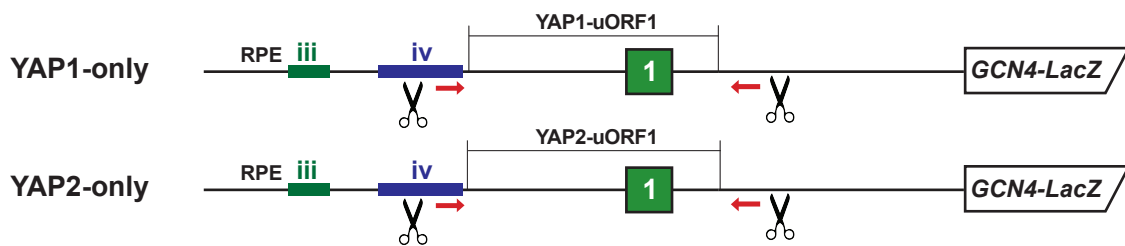

C

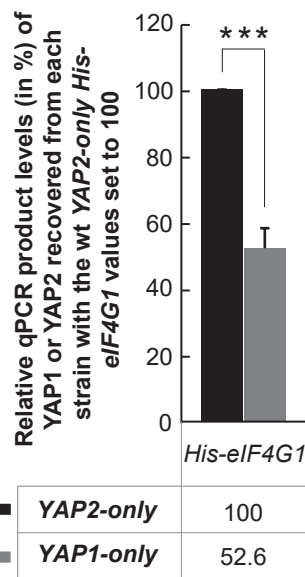

D

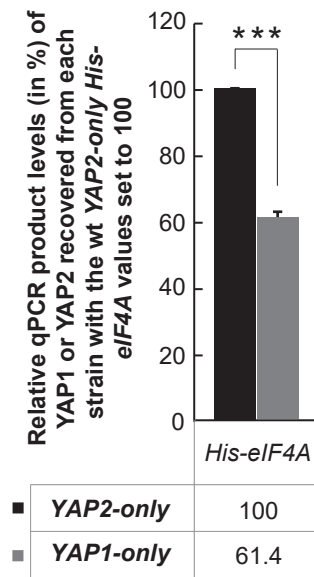

E

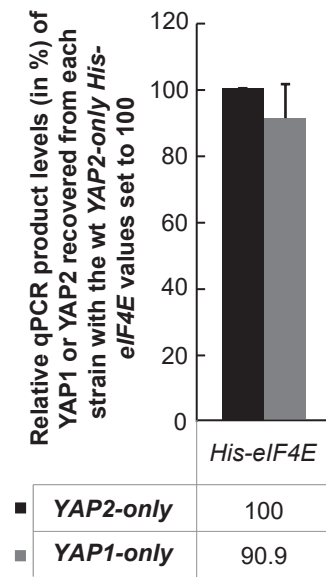

**Supplementary Figure 5. eIF4F complex is retained on post-termination ribosomes on REI-permissive uORF1 of YAP1 and 2 mRNA leaders.** (A) Schematics showing the design of YAP1- and YAP2-only RaP-NiP constructs. YAP1- or YAP2-only constructs were constructed by swapping the YAP1- or YAP2-uORF1 fragment with the GCN4-uORF1 fragment in the context of the uORF1-only construct. The RNase H cutting sites (indicated by scissors) and the RT-PCR primer binding sites (indicated by red arrows) were preserved. (B) Schematics showing the resulting YAP1- and YAP2-only RaP-NiP constructs. (C) The YMP53 (*gcn4Δ tif4631Δ tif4632Δ His-eIF4G1*) strain was introduced with the YAP1- or YAP2-only RaP-NiP constructs shown in panel A and treated as described in panel B of Figure 1. Relative qPCR product levels (in %) of the YAP1-uORF1 or YAP2-uORF1 segments recovered from the His-eIF4G1 expressing strain were processed as described in panel B of Figure 1 with the values of His-eIF4G1 YAP2-only set to 100 % (\*\* $p < 0.0005$ ). (D) The YMP63 (*gcn4Δ tif1Δ tif2Δ His-eIF4A*) strain was introduced with the YAP1- or YAP2-only RaP-NiP constructs shown in panel A and treated as described in panel B. Relative qPCR product levels (in %) of the YAP1-uORF1 or YAP2-uORF1 segments recovered from the His-eIF4A expressing strain were processed as described in panel B with the values of His-eIF4A YAP2-only set to 100 % (\*\* $p < 0.0005$ ). (E) The YMP67 (*gcn4Δ cdc33/tif45Δ His-eIF4E*) strain was introduced with the YAP1- or YAP2-only RaP-NiP constructs shown in panel A and treated as described in panel B. Relative qPCR product levels (in %) of the YAP1-uORF1 or YAP2-uORF1 segments recovered from His-eIF4E expressing strains were processed as described in panel B with the values of His-eIF4E YAP2-only set to 100 %

## SUPPLEMENTARY TABLES

Supplementary Table 1. Yeast strains used in this study.

| Strain                    | Genotype                                                                                                                                                                            | Source or reference |
|---------------------------|-------------------------------------------------------------------------------------------------------------------------------------------------------------------------------------|---------------------|
| BY4741<br><i>gcn4Δ</i>    | <i>MATa gcn4::KanMX4 his3Δ1 leu2Δ0 met15Δ0 ura3Δ0</i>                                                                                                                               | Euroscarf           |
| BY4741<br><i>tif4631Δ</i> | <i>MATa tif4631::KanMX4 his3Δ1 leu2Δ0 met15Δ0 ura3Δ0</i>                                                                                                                            | Euroscarf           |
| BY4741<br><i>tif4632Δ</i> | <i>MATa tif4632::KanMX4 his3Δ1 leu2Δ0 met15Δ0 ura3Δ0</i>                                                                                                                            | Euroscarf           |
| BY4741<br><i>tif1Δ</i>    | <i>MATa tif1::KanMX4 his3Δ1 leu2Δ0 met15Δ0 ura3Δ0</i>                                                                                                                               | Euroscarf           |
| BY4741<br><i>tif2Δ</i>    | <i>MATa tif2::KanMX4 his3Δ1 leu2Δ0 met15Δ0 ura3Δ0</i>                                                                                                                               | Euroscarf           |
| H2880 <sup>a</sup>        | <i>MATa, leu2-3, -112 ura3-52 trp1Δ</i>                                                                                                                                             | (6)                 |
| H2881 <sup>a</sup>        | <i>MATa, leu2-3, -112 ura3-52 trp1Δ gcn2Δ</i>                                                                                                                                       | (6)                 |
| YMP43 <sup>a</sup>        | <i>MATa, leu2-3, -112 ura3-52 trp1Δ gcn4 (incl. 5' UTR) ::KanMX::hisG-URA3-HisG, ura3</i>                                                                                           | this study          |
| YMP47 <sup>a</sup>        | <i>MATa, leu2-3, -112 ura3-52 trp1Δ gcn4 (incl. 5' UTR) ::KanMX::hisG-URA3-HisG, ura3, tif4632::KanMX ::hisG-URA3-HisG, ura3, tif4631::KanMX (YCp-TIF4632-URA)</i>                  | this study          |
| YMP52 <sup>a</sup>        | <i>MATa, leu2-3, -112 ura3-52 trp1Δ gcn4 (incl. 5' UTR) ::KanMX::hisG-URA3-HisG, ura3, tif4632::KanMX ::hisG-URA3-HisG, ura3, tif4631::KanMX (YE<sub>p</sub>-TIF4631-LEU)</i>       | this study          |
| YMP53 <sup>a</sup>        | <i>MATa, leu2-3, -112 ura3-52 trp1Δ gcn4 (incl. 5' UTR) ::KanMX::hisG-URA3-HisG, ura3, tif4632::KanMX::hisG-URA3-HisG, ura3, tif4631::KanMX (YE<sub>p</sub>-His-TIF4631-LEU)</i>    | this study          |
| YMP55 <sup>a</sup>        | <i>MATa, leu2-3, -112 ura3-52 trp1Δ gcn4 (incl. 5' UTR) ::KanMX::hisG-URA3-HisG, ura3, tif4632::KanMX::hisG-URA3-HisG, ura3, tif4631::KanMX (YE<sub>p</sub>-His-tif4631-1-LEU)</i>  | this study          |
| YMP56 <sup>a</sup>        | <i>MATa, leu2-3, -112 ura3-52 trp1Δ gcn4 (incl. 5' UTR) ::KanMX::hisG-URA3-HisG, ura3, tif4632::KanMX ::hisG-URA3-HisG, ura3, tif4631::KanMX (YE<sub>p</sub>-His-tif4631-8-LEU)</i> | this study          |

|                    |                                                                                                                                                                                       |            |
|--------------------|---------------------------------------------------------------------------------------------------------------------------------------------------------------------------------------|------------|
| YMP91 <sup>a</sup> | <i>MATa, leu2-3, -112 ura3-52 trp1Δ gcn4 (incl. 5' UTR) ::KanMX::hisG-URA3-HisG, ura3, tif4632::KanMX ::hisG-URA3-HisG, ura3, tif4631::KanMX (YE<sub>p</sub>-His-tif4631-8*-LEU)</i>  | this study |
| YMP57 <sup>a</sup> | <i>MATa, leu2-3, -112 ura3-52 trp1Δ gcn4 (incl. 5' UTR) ::KanMX::hisG-URA3-HisG, ura3, tif4632::KanMX ::hisG-URA3-HisG, ura3, tif4631::KanMX (YE<sub>p</sub>-His-tif4631-459-LEU)</i> | this study |
| YMP61 <sup>a</sup> | <i>MATa, leu2-3, -112 ura3-52 trp1Δ gcn4 (incl. 5' UTR) ::KanMX::hisG-URA3-HisG, ura3, tif2::KanMX ::hisG-URA3-HisG, ura3, tif1::KanMX (YE<sub>p</sub>-TIF2-URA)</i>                  | this study |
| YMP63 <sup>a</sup> | <i>MATa, leu2-3, -112 ura3-52 trp1Δ gcn4 (incl. 5' UTR) ::KanMX::hisG-URA3-HisG, ura3, tif2::KanMX::hisG-URA3-HisG, ura3, tif1::KanMX (YE<sub>p</sub>-His-TIF2-LEU)</i>               | this study |
| YMP65 <sup>a</sup> | <i>MATa, leu2-3, -112 ura3-52 trp1Δ gcn4 (incl. 5' UTR) ::KanMX::hisG-URA3-HisG, ura3, tif45::KanMX (YE<sub>p</sub>-TIF45-URA)</i>                                                    | this study |
| YMP67 <sup>a</sup> | <i>MATa, leu2-3, -112 ura3-52 trp1Δ gcn4 (incl. 5' UTR) ::KanMX::hisG-URA3-HisG, ura3, tif45::KanMX (YE<sub>p</sub>-His-TIF45-LEU)</i>                                                | this study |

<sup>a</sup> Isogenic strains



**Supplementary Table 2. Plasmids used in this study.**

| <b>Plasmid</b>                      | <b>Description</b>                                                                                                                                                                    | <b>Source or reference</b>              |
|-------------------------------------|---------------------------------------------------------------------------------------------------------------------------------------------------------------------------------------|-----------------------------------------|
| p180 ( <i>YCp50-GCN4-lacZ</i> )     | low copy <i>URA3</i> vector containing WT <i>GCN4</i> leader fused with <i>lacZ</i>                                                                                                   | (7)                                     |
| p349 ( <i>YEplac181-LEU2</i> )      | high copy <i>LEU2</i> empty vector                                                                                                                                                    | (8)                                     |
| p533 ( <i>YEplac195-TIF2-URA3</i> ) | High-copy <i>URA3</i> vector containing <i>TIF2</i> ORF                                                                                                                               | (9)                                     |
| p544 ( <i>YEplac181-TIF2-LEU2</i> ) | High-copy <i>LEU2</i> vector containing <i>TIF2</i> ORF                                                                                                                               | (10)                                    |
| p350 ( <i>YEplac195-URA3</i> )      | high copy <i>URA3</i> empty vector                                                                                                                                                    | (8)                                     |
| p467 (uORF1-extended)               | low copy <i>URA3</i> vector containing uORF1 (GC) extends into <i>GCN4</i> sequence                                                                                                   | Grant et. al. (1994)<br>MCB 14: 2616-28 |
| pMP29 (uORF1-only)                  | low copy <i>URA3</i> vector containing uORF1 only with its genuine 5' and 3' flanking sequences                                                                                       | (1)                                     |
| pMP30 (uORF4-only)                  | low copy <i>URA3</i> vector containing uORF4 only with its genuine 5' and 3' flanking sequences                                                                                       | (1)                                     |
| pMP32 (uORF1-SUB40)                 | low copy <i>URA3</i> vector containing uORF1 only; the sequences -48 to -40 upstream of uORF1 were substituted by complementary sequences                                             | (1)                                     |
| pMP33 (uORF1-CAAll)                 | low copy <i>URA3</i> vector containing uORF1 only; the -143 to -122 upstream sequences were substituted by a stretch of CAA triplets of the identical length to the original sequence | (1)                                     |
| pMP34 (uORF2-only)                  | low copy <i>URA3</i> vector containing uORF2 only with its genuine 5' and 3' flanking sequences                                                                                       | (1)                                     |
| pMP35 (uORF4_2-only)                | low copy <i>URA3</i> vector containing uORF4 only with its genuine 5' and 3' flanking sequences                                                                                       | (1)                                     |
| pMP53 (uORF3-only)                  | low copy <i>URA3</i> vector containing uORF3 only with its genuine 5' and 3' flanking sequences                                                                                       | (1)                                     |

|                                             |                                                                                                           |            |
|---------------------------------------------|-----------------------------------------------------------------------------------------------------------|------------|
| pBAS2078                                    | Low copy <i>TRP2</i> vector containing <i>TIF4631</i> ORF with <i>TIF4632</i> 5' & 3'-UTRs                | (11)       |
| pBAS2004                                    | Low copy <i>URA3</i> vector containing <i>TIF4632</i> ORF with <i>TIF4632</i> 5' & 3'-UTRs                | (11)       |
| pMP82 ( <i>YEp181-TIF4631-LEU</i> )         | High-copy <i>LEU2</i> vector containing <i>TIF4631</i> ORF                                                | this study |
| pMP83 ( <i>YEp181-His-TIF4631-LEU</i> )     | High-copy <i>LEU2</i> vector containing His- <i>TIF4631</i> ORF                                           | this study |
| pMP89 ( <i>YEp181-His-TIF4631-1</i> )       | High-copy <i>LEU2</i> vector containing His- <i>tif4631-1</i> ORF                                         | this study |
| pMP90 ( <i>YEp181-His-TIF4631-8</i> )       | High-copy <i>LEU2</i> vector containing His- <i>tif4631-8</i> ORF                                         | this study |
| pMP91 ( <i>YEp181-His-TIF4631-459</i> )     | High-copy <i>LEU2</i> vector containing His- <i>tif4631-459</i> ORF                                       | this study |
| pMP85 ( <i>pAG25-kanMX::HisG-URA-HisG</i> ) | High-copy vector containing <i>kanMX::HisG-URA-HisG</i> disruption cassette                               | this study |
| pMP93 ( <i>YEp181-His-TIF2</i> )            | High-copy <i>LEU2</i> vector containing His- <i>TIF2</i> ORF                                              | this study |
| pMP98 ( <i>YEp181- tif45::KanMX</i> )       | High-copy <i>LEU2</i> vector containing <i>tif45::KanMX</i> disruption cassette                           | this study |
| pMP95 ( <i>YEp181-TIF45</i> )               | High-copy <i>URA3</i> vector containing <i>TIF45</i> ORF                                                  | this study |
| pMP97 ( <i>YEp181-His-TIF45</i> )           | High-copy <i>LEU2</i> vector containing His- <i>TIF45</i> ORF                                             | this study |
| pMP121 ( <i>Ycp22-GCN4</i> )                | low copy <i>TRP2</i> vector containing WT <i>GCN4</i> leader                                              | this study |
| pMP122 ( <i>Ycp50-YAP1-GCN4</i> )           | low copy <i>URA3</i> vector containing uORF1 of <i>YAP1</i> with its genuine 5' and 3' flanking sequences | this study |
| pMP123 ( <i>Ycp50-YAP2-GCN4</i> )           | low copy <i>URA3</i> vector containing uORF1 of <i>YAP2</i> with its genuine 5' and 3' flanking sequences | this study |
| pMP124 ( <i>YEp181-His-TIF4631-8*</i> )     | High-copy <i>LEU2</i> vector containing His- <i>tif4631-8*</i> ORF                                        | this study |

Supplementary Table S3. Oligonucleotides used in this study.

| <b>Oligonucleotide</b> | <b>Sequence (5' to 3')</b>                                                                  |
|------------------------|---------------------------------------------------------------------------------------------|
| VM4                    | TCGGCTCGCTGCTTACCTTTTAAAATCTTCTACTTCTTGACAGTACTTATCTTCTTATATAATAGATATCG<br>TACGCTGCAGGTCGAC |
| VM25                   | TTTAAAGTTTCATTCCAGCATTAGC                                                                   |
| MP1                    | GTTTTCCCAGTCACGACGTT                                                                        |
| MP2                    | AACAGCTATGACCATGATTACGC                                                                     |
| MP7                    | GGGAAATTTTTATTGGCGAGTAAAC                                                                   |
| MP79                   | GTGGCTGGTGAGTTGTATAATTCGC                                                                   |
| MP8                    | GCTCACTCATCTACTTCGCAATC                                                                     |
| MP46                   | TGGATAATTTGACAGAAAGGTAACC                                                                   |
| MP145                  | GCCTTCTACGTTTCCATCCA                                                                        |
| MP146                  | GGCCAAATCGATTCTCAAAA                                                                        |
| MP150                  | CTG TGG ATC CAT GGT GAT GGT GGT GGT GAT GAT GCA TAT GTG CCT ACA ATT GAT CTA TTG             |
| MP153                  | ATA CGC AGC CCT GAC ATT TGT AG                                                              |
| MP154                  | GA AAT ATA TGT TAC GTT ATC AAG ATA GCC TCA C                                                |

|       |                                                                   |
|-------|-------------------------------------------------------------------|
| MP155 | ATA TCA TCG AAC TTG TAG ACA ACC TTG TC                            |
| MP156 | AGC AGA TCC CAA TAC ACA TAG TAG G                                 |
| MP157 | GGC AAA ATA ATA TCA TAT AGG GGG TCA AG                            |
| MP158 | GAG AAA GTA CCG GTC TTA CCA GTA C                                 |
| MP159 | GTA CTG GTA AGA CCG GTA CTT TCT C                                 |
| MP220 | TTA AAG CTT CTT ACT TTA CTC CTT CTT GC                            |
| MP221 | GAT TAG CAG GGG CAC TAC CAG                                       |
| MP222 | ATG AGG AAG AGG AGA GAC AAC GTC                                   |
| MP223 | TTA GAC TTT CTA CCA ACA TCC TTG TAT CC                            |
| MP224 | CTA CGG CGA CTT CAT ATT TTT AGG C                                 |
| MP225 | CAT CTG AGG AGC ATA GTA GTT AGC TGG                               |
| MP226 | CAA TTA CGT CAG AAA AAG AAC AGT CAG AG                            |
| MP227 | TGA TGA AAG ATC AGG TCT AGT TAA TGC AC                            |
| MP294 | GAA CAC GTC AAA TAT ACA TAT GGC CCA ACT TTC GCT GCT CAA TTT AAG G |
| MP295 | GGG GCT AGC TTC TTT TCA GTC                                       |

|       |                                                                                                           |
|-------|-----------------------------------------------------------------------------------------------------------|
| MP296 | GAA GCT AGC CCC TGA CGG AAA G                                                                             |
| MP297 | GAA TAA TAT TGT CAG AAA TAC CGA ACA AAC                                                                   |
| MP298 | GTT TGT TCG GTA TTT CTG ACA ATA TTA TTC                                                                   |
| MP299 | GTC TCA AAT TGA CCA CCA ACA GTA TTT AAC                                                                   |
| MP300 | GTT AAA TAC TGT TGG TGG TCA ATT TGA GAC                                                                   |
| MP301 | GAA AAT CTG TTC TAT ACC AGC CTT TAA CG                                                                    |
| MP302 | CGT TAA AGG CTG GTA TAG AAC AGA TTT TC                                                                    |
| MP303 | GAA AAT CTG TTC TAT ATC AGC CTT TAA CG                                                                    |
| MP304 | CGT TAA AGG CTG ATA TAG AAC AGA TTT TC                                                                    |
| MP305 | CTT TGA TCT TCT TCT TGA TGA AGT TCT TG                                                                    |
| MP306 | CAT CAA GAA GAA GAT CAA AGA GAA TGA ATG ACG ACT CTA GAT CTA ATA GAT C                                     |
| MP307 | TCG TGG CCA TGA CTT TAT TAA TAC CTC AG                                                                    |
| MP308 | CTA ATA AAT AGT AAT TGC AAT ATG CAT CAT CAC CAC CAC CAT CAC CAT GGA TCT GAA GGT<br>ATT ACT G              |
| MP309 | CAT ATT GCA ATT ACT ATT TAT TAG TTT CTT GTA C                                                             |
| MP312 | AGG AGT TTT ACG AAA AAT AAA AGC ATT TTT GTC TGA AAA CTA GTG AAA GGA AGA AAA ATG<br>GAT GTC CAC GAG GTC TC |

|       |                                                                                                           |
|-------|-----------------------------------------------------------------------------------------------------------|
| MP313 | ATT ATA TAT ATA ATT TTG ATT AAA ATA ACA ATT ATC TTA AGA AAA ATT CAG ACT ATC TTA CGG<br>TGT CGG TCT CGT AG |
| MP314 | CCG CTC TAG AAG TTT GGA TAC TGG TAT TGT GAC TC                                                            |
| MP315 | GCA GCC CGG GAC GAT TGA AGA CGA ACT AAT CGA AG                                                            |
| MP316 | AGA CGG TAC CAT GTC CGT TGA AGA AGT TAG CAA G                                                             |
| MP317 | CTA CGT CGA CTT ACA AGG TGA TTG ATG GTT GAG G                                                             |
| MP318 | CTT GCT AAC TTC TTC AAC GGA TCC ATG GTG ATG GTG GTG GTG ATG ATG CAT TTT TCT TCC<br>TTT CAC TAG            |
| MP319 | TCC GTT GAA GAA GTT AGC AAG AAG                                                                           |
| MP320 | AAACTAGTGATGTCCACGAGGTCTCTCAC                                                                             |
| MP321 | CCTAACTAGTCGGTGTCGGTCTCGTAGC                                                                              |
| MP322 | CCCTCAACCATCAATCACCTTG                                                                                    |
